# Supplementary material
Source: Springer Nature journal article supplement (https://www.springermedizin.de/resource/supplementary/12985_2010_925_MOESM6_ESM.pdf/9608752)

(a)

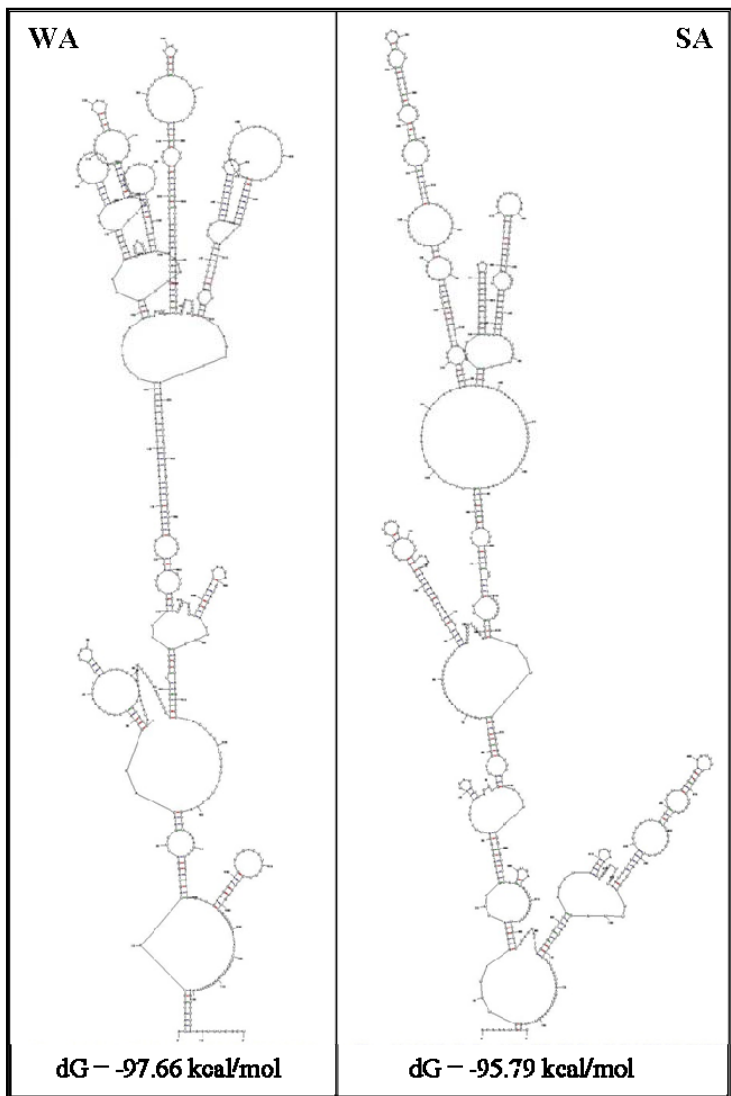

(b)

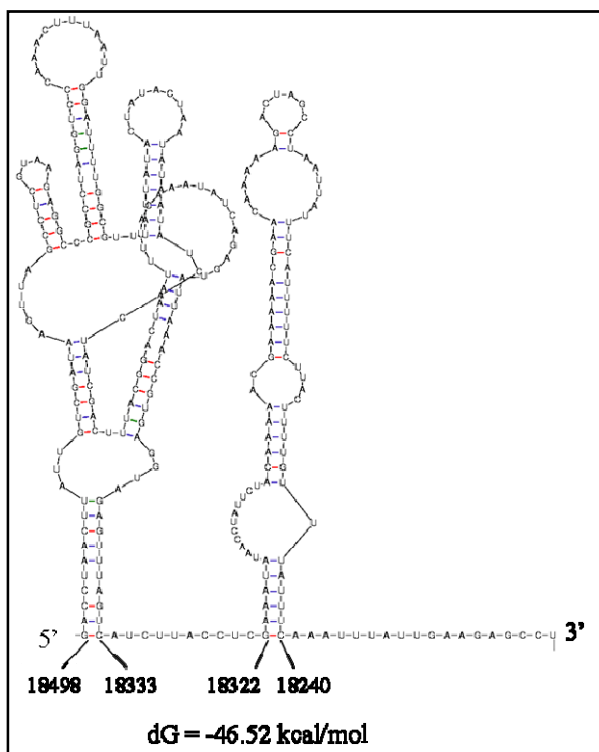

Supplement: MOESM6 [file 9608752]
